# Supplementary material
Source: PubMed Central journal article supplement (PMC3918936)
Supplement: jbjs_96_4_e27_ds01.pdf [file jbjs_96_4_e27_ds01.pdf]

**TABLE E-1 International Classification of Diseases, Ninth Revision (ICD-9) Codes Representing the Hip Fracture Diagnosis in the Medicare Beneficiary Annual Summary File**

| ICD-9 Code | Diagnosis                                                             |
|------------|-----------------------------------------------------------------------|
| 733.14     | Pathological fracture of neck of femur                                |
| 733.15     | Pathological fracture of other specified part of femur                |
| 733.96     | Stress fracture of femoral neck                                       |
| 733.97     | Stress fracture of shaft of femur                                     |
| 733.98     | Stress fracture of pelvis                                             |
| 808.0      | Closed fracture of acetabulum                                         |
| 808.1      | Open fracture of acetabulum                                           |
| 808.2      | Closed fracture of pubis                                              |
| 808.3      | Open fracture of pubis                                                |
| 808.41     | Closed fracture of ilium                                              |
| 808.42     | Closed fracture of ischium                                            |
| 808.43     | Multiple closed pelvic fractures with disruption of pelvic circle     |
| 808.49     | Closed fracture of other specified part of pelvis                     |
| 808.51     | Open fracture of ilium                                                |
| 808.52     | Open fracture of ischium                                              |
| 808.53     | Multiple open pelvic fractures with disruption of pelvic circle       |
| 808.59     | Open fracture of other specified part of pelvis                       |
| 808.8      | Unspecified closed fracture of pelvis                                 |
| 808.9      | Unspecified open fracture of pelvis                                   |
| 820.00     | Fracture of unspecified intracapsular section of neck of femur closed |
| 820.01     | Fracture of epiphysis (separation) (upper) of neck of femur closed    |
| 820.02     | Fracture of midcervical section of femur closed                       |
| 820.03     | Fracture of base of neck of femur closed                              |
| 820.09     | Other transcervical fracture of femur closed                          |
| 820.10     | Fracture of unspecified intracapsular section of neck of femur open   |
| 820.11     | Fracture of epiphysis (separation) (upper) of neck of femur open      |
| 820.12     | Fracture of midcervical section of femur open                         |
| 820.13     | Fracture of base of neck of femur open                                |
| 820.19     | Other transcervical fracture of femur open                            |
| 820.20     | Fracture of unspecified trochanteric section of femur closed          |
| 820.21     | Fracture of intertrochanteric section of femur closed                 |
| 820.22     | Fracture of subtrochanteric section of femur closed                   |
| 820.30     | Fracture of unspecified trochanteric section of femur open            |
| 820.31     | Fracture of intertrochanteric section of femur open                   |
| 820.32     | Fracture of subtrochanteric section of femur open                     |
| 820.8      | Fracture of unspecified part of neck of femur closed                  |
| 820.9      | Fracture of unspecified part of neck of femur open                    |
